# Supplementary material for: The Role of Vitamin D and Vitamin D Receptor in Immunity to Leishmania major Infection
Source: PubMed Central journal article supplement (PMC3191735; doi:10.1155/2012/134645), 2011-10-11

554 **SUPPLEMENTAL FIGURE LEGENDS**

555

556 **Supplemental Figure 1. VDRKO mice have increased numbers of T-cells in the**  
557 **draining lymph nodes.** C57BL/6 WT (closed bars) and VDRKO (open bars) mice were  
558 infected with  $10^5$  *L. major* parasites and their submandibular lymph nodes were harvested  
559 at the indicated time points. Lymph nodes were homogenized, pooled (n=4), and  
560 analyzed by flow cytometry. Numbers of (A) T-helper cells (TCR+/CD4+), (B)  
561 Cytotoxic T-cells (TCR+/CD8+), and (C) T-regulatory cells (CD4+/CD25+/FoxP3+)  
562 were calculated. One representative of two independent experiments is presented.

563 **Supplemental Figure 2. Restimulation of lymph nodes.** C57BL/6 VDRKO and WT  
564 mice were infected in the ears with  $10^5$  *L. major* parasites. Lymph nodes were harvested  
565 and homogenized at the indicated time points. Cell homogenates were plated in 96 well  
566 plates and restimulated with soluble *Leishmania* antigen. The supernatants were  
567 analyzed by multi-analyte immunoassay for cytokines representative of Th-1 and Th-2  
568 responses. One representative of two independent experiments is presented. \* $p \leq 0.05$ . n  
569 = 4 mice/time point.

570 **Supplemental Figure 3. Nitric oxide and IL-12p40 by macrophages from WT and**  
571 **VDRKO mice.** Macrophages were treated with IFN $\gamma$  and/or 1,25D3 for 24 hr prior to  
572 being infected at a ratio of 5:1 with *L. major*. The cells were infected for 4 hr, washed to  
573 remove extracellular parasites. Supernatants were harvested 48 hr post-infection and  
574 analyzed for production of NO (A) and IL-12p40 (B). Mean  $\pm$  standard error is  
575 presented; (n=4). \* $p \leq 0.05$ .

576

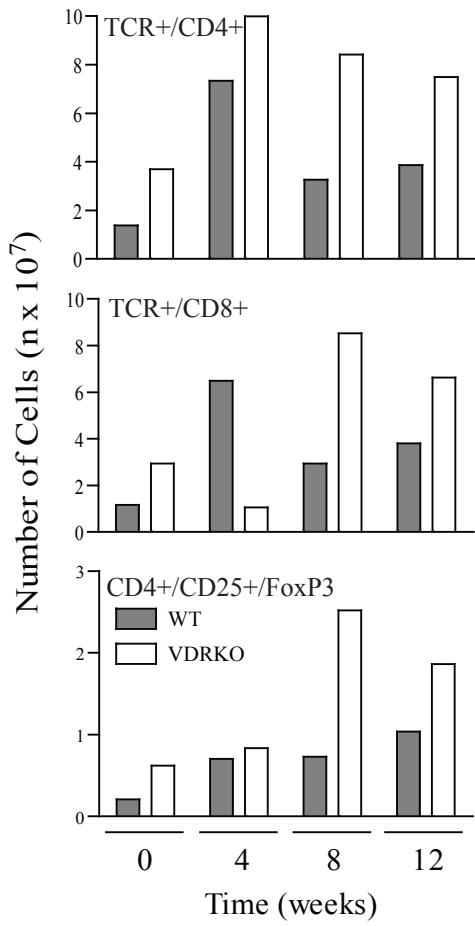

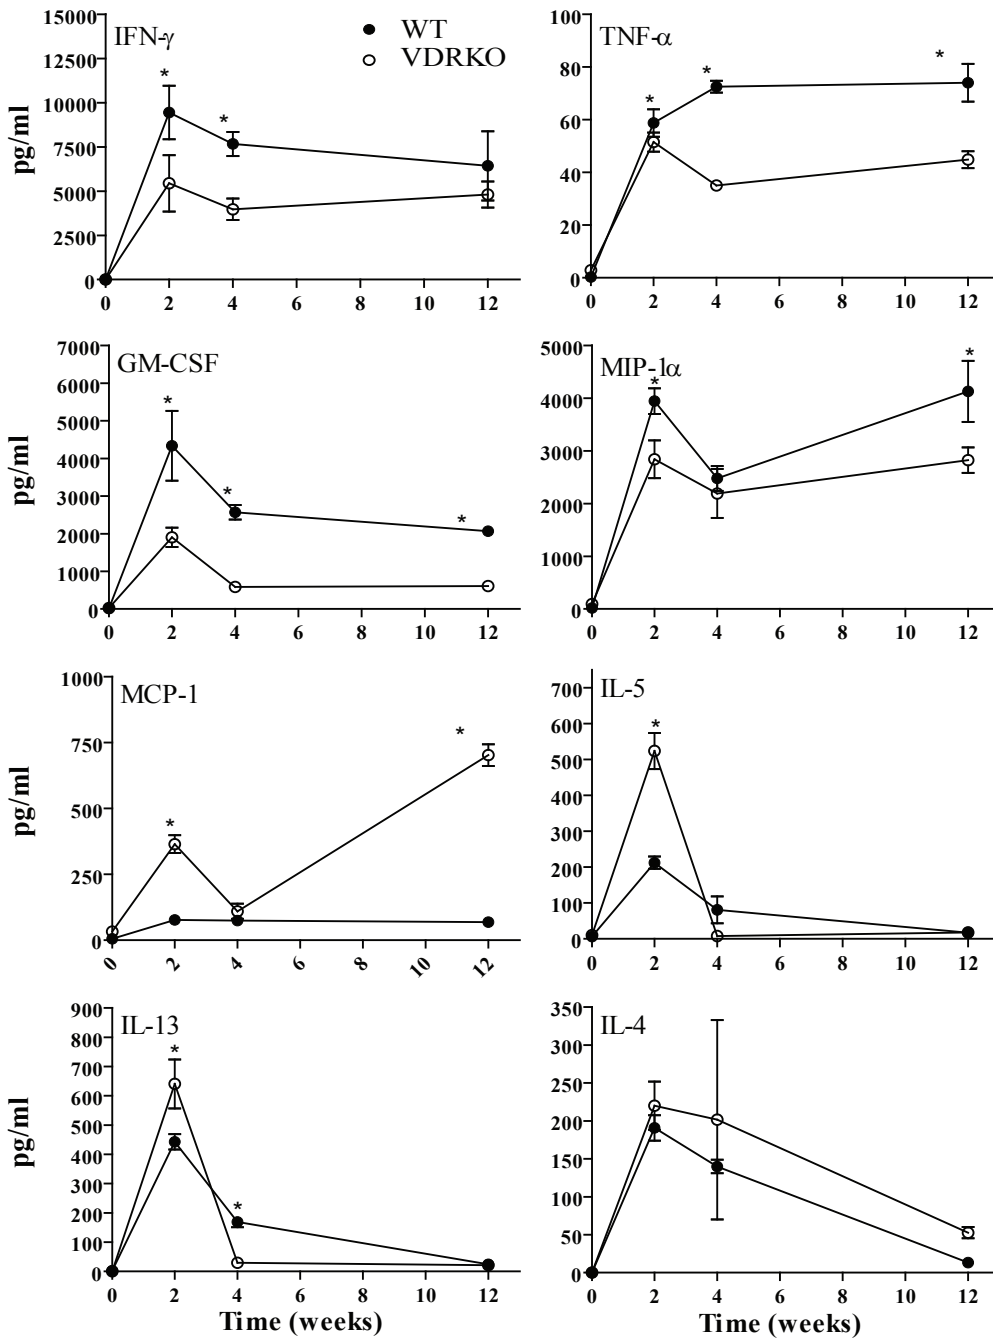

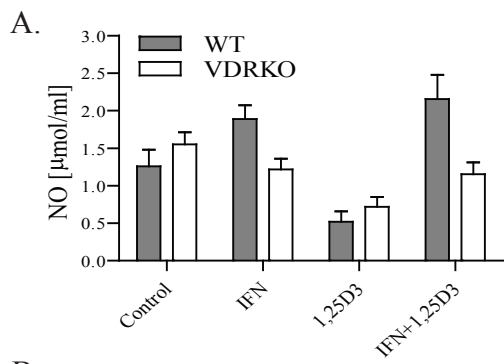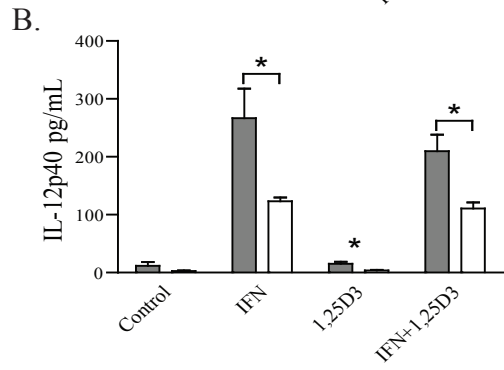

Supplement: 134645.f1.pdf [file 134645.f1.pdf]
